# Supplementary material for: The effects of a series of carbon dots on fibrillation and cytotoxicity of human islet amyloid polypeptide
Source: Royal Society of Chemistry journal article supplement (doi:10.1039/c6tb00921b), 2016-01-01
Supplement: c6tb00921b1.pdf [file c6tb00921b1.pdf]

## Supporting Information

### **The effects of serial of carbon dots to fibrillation and cytotoxicity of human islet amyloid polypeptide**

*Li Wang,<sup>a</sup> Shoujun Zhu,<sup>a</sup> Tong Lu,<sup>a</sup> Guangji Zhang,<sup>b</sup> Jia Xu,<sup>b</sup> Yubin Song,<sup>a</sup> **Yang Li,<sup>a</sup>***

*Liping Wang,<sup>b</sup> Bai Yang<sup>\*a</sup> and Fei Li<sup>\*a</sup>*

<sup>a</sup> State Key Laboratory of Supramolecular Structure and Materials, Jilin University,  
Changchun 130012, P. R. China

<sup>b</sup> College of Life Science, Jilin University, Changchun 130012, P. R. China

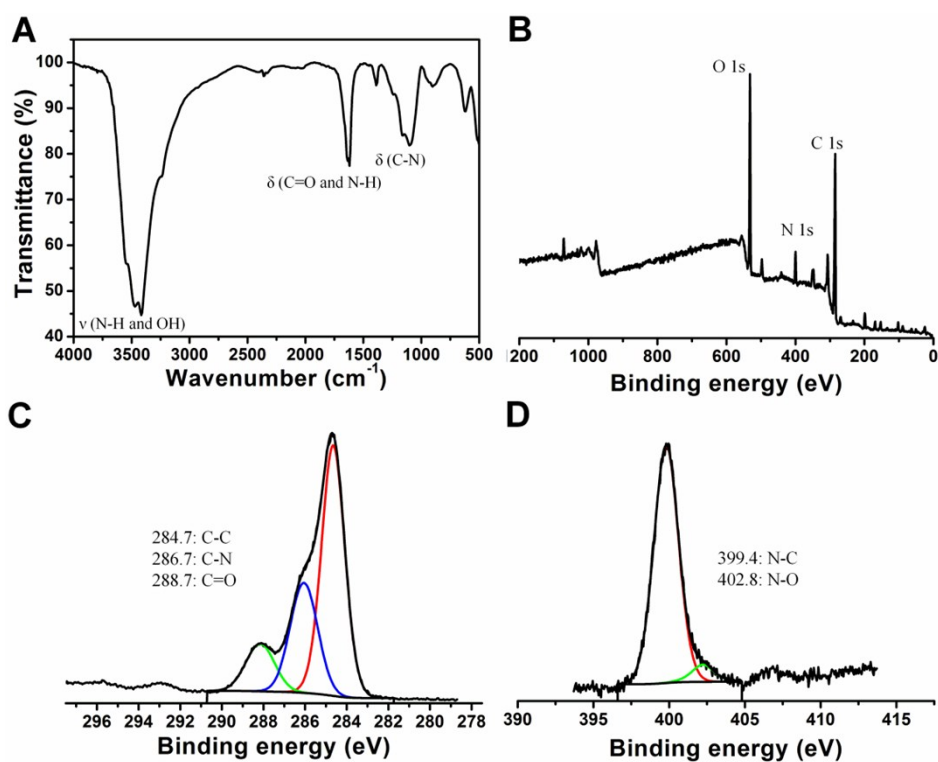

**Figure S1** (A) IR image of the PDs-1. (B, C, D) XPS data of PDs-1.

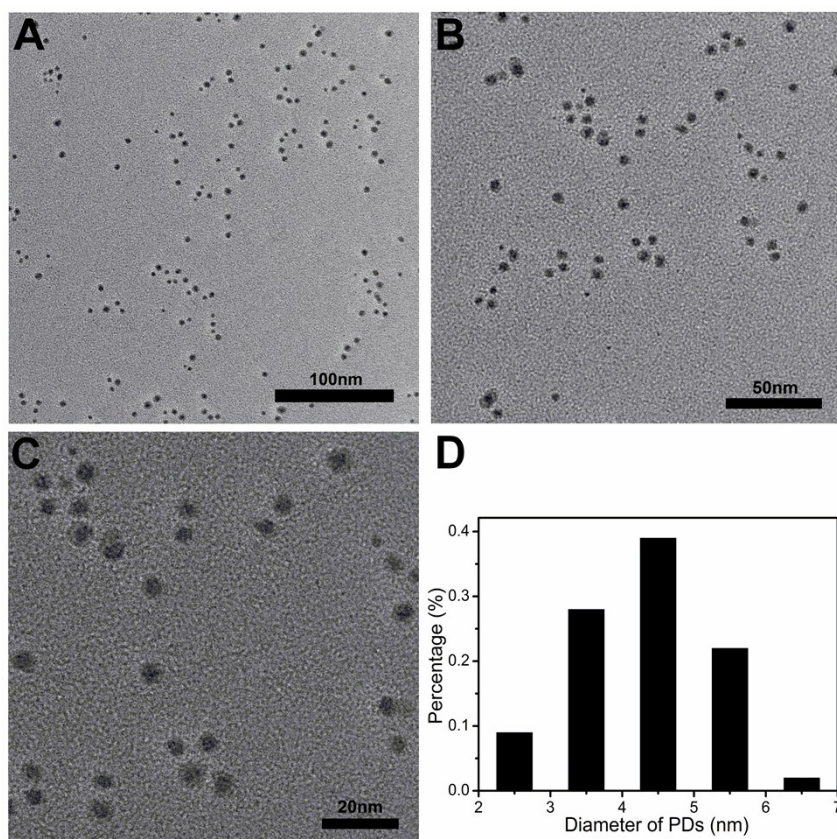

**Figure S2** (A, B and C) Three typical TEM images of PDs-1 by which the size distribution is obtained. (D) The corresponding particle size distribution histograms of PDs-1.

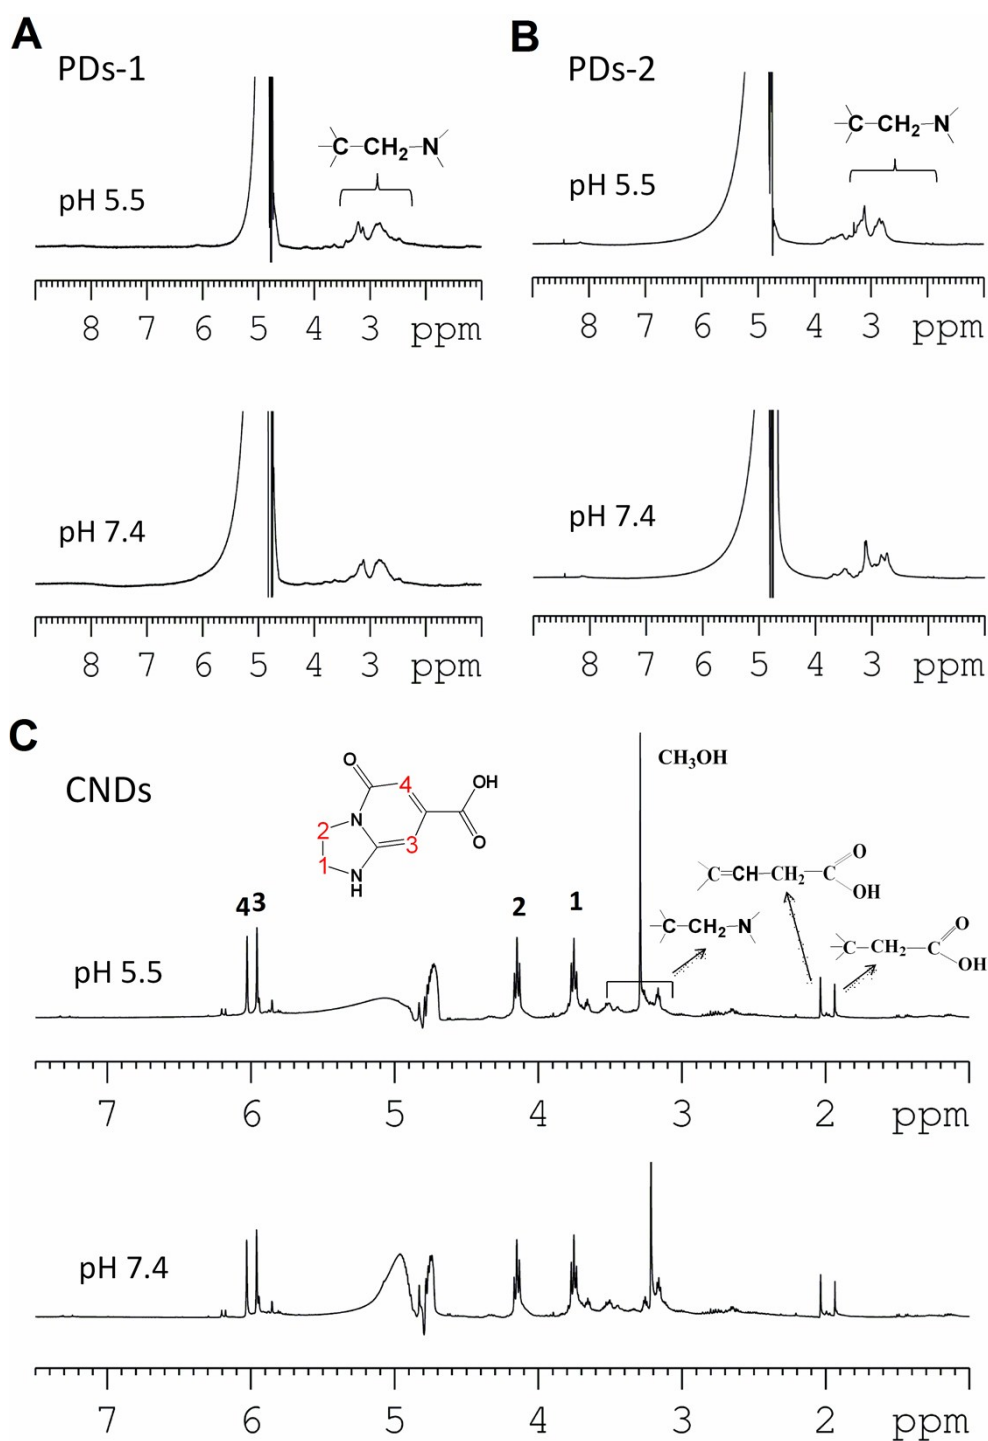

**Figure S3** The  $^1\text{H}$  NMR spectra of PDs-1 (A), PDs-2 (B) and CNDs (C) in PBS solution at pH 5.5 and 7.4. The resonances in the region of *ca.* 2.6-3.8 ppm in (A) and (B) are assigned to the methylene binding to different amine groups originating from PEI. A new molecule that is produced by the reaction between citric acid and ethylenediamine is identified as a main composition of CNDs based on the analysis of the  $^1\text{H}$  NMR spectra. The assignments of the proton signals of the main composition molecule are indicated in the spectra.

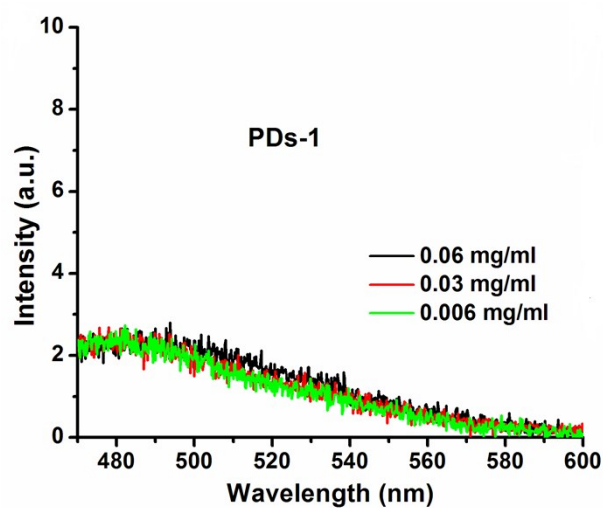

**Figure S4** The fluorescence spectra of different concentrations of PDs-1.

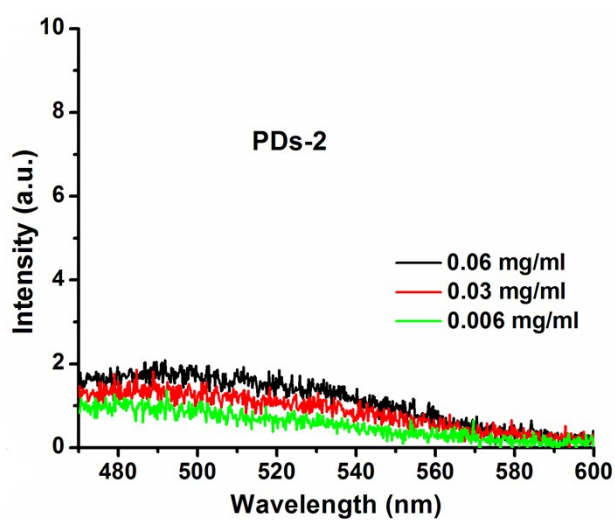

**Figure S5** The fluorescence spectra of different concentrations of PDs-2.

| Samples           | Incubation<br>time (h) | $\alpha$ -Helix | $\beta$ -Structure | Unordered |
|-------------------|------------------------|-----------------|--------------------|-----------|
| hIAPP             | 0                      | 1.7%            | 41.8%              | 56.4%     |
| hIAPP+PDs-1 (1:1) |                        | 2.6%            | 30.3%              | 67%       |
| hIAPP+PDs-2 (1:1) |                        | 1.6%            | 31.1%              | 67.4%     |
| hIAPP+CNDs (1:1)  |                        | 2.4%            | 40.5%              | 57.1%     |
| hIAPP+CQDs (1:1)  |                        | 2.7%            | 41.3%              | 56%       |
| hIAPP+GQDs (1:1)  |                        | 2.4%            | 37.5%              | 60.7%     |
| hIAPP             | 24                     | 3.6%            | 63.7%              | 32.7%     |
| hIAPP+PDs-1 (1:1) |                        | 2.6%            | 53%                | 44.5%     |
| hIAPP+PDs-2 (1:1) |                        | 1%              | 34.9%              | 64.3%     |
| hIAPP+CNDs (1:1)  |                        | 3.2%            | 60.3%              | 36.5%     |
| hIAPP+CQDs (1:1)  |                        | 2.9%            | 61.1%              | 36%       |
| hIAPP+GQDs(1:1)   |                        | 3.3%            | 60.7%              | 33.3%     |

**Table S1** Secondary structure contents (in %) of hIAPP in PBS buffer estimated by the CDPro software package with the program CONTINLL using SDP42 set.<sup>[1]</sup>

[1] B. Cheng, X. Liu, H. Gong, L. Huang, H. Chen, X. Zhang, C. Li, M. Yang, B. Ma, L. Jiao, *J. Agric. Food. Chem.* **2011**, 59, 13147.
